# Supplementary material for: Knowledge, attitude, and practice towards face mask use among residents of Greater Chennai Corporation, India, March 2021
Source: Frontiers journal article supplement (doi:10.3389/fpubh.2022.938642), 2022-07-28
Supplement: Data_Sheet_1.PDF [file Data_Sheet_1.PDF]

## Supplementary file 1: Surveillance for mask compliance, Tamil Nadu, India

| S. no                    | Question                           | Type of variable | Response                                                                                                                                                                                              | Remarks |
|--------------------------|------------------------------------|------------------|-------------------------------------------------------------------------------------------------------------------------------------------------------------------------------------------------------|---------|
| <b>Interview details</b> |                                    |                  |                                                                                                                                                                                                       |         |
| 1.                       | Date of interview                  | Date entry       |                                                                                                                                                                                                       |         |
| 2.                       | Name of the interviewer            | Text             |                                                                                                                                                                                                       |         |
| 3.                       | Zone (For Chennai)                 | Nominal          | a) Zone 1<br>b) Zone 2<br>c) Zone 3<br>d) Zone 4<br>e) Zone 5<br>f) Zone 6<br>g) Zone 7<br>h) Zone 8<br>i) Zone 9<br>j) Zone 10<br>k) Zone 11<br>l) Zone 12<br>m) Zone 13<br>n) Zone 14<br>o) Zone 15 |         |
| 4.                       | Street/village code (pre-assigned) | Numeric          |                                                                                                                                                                                                       |         |
| 5.                       | Locality/Area (e.g. Velachery)     | Text             |                                                                                                                                                                                                       |         |
| <b>Demographics</b>      |                                    |                  |                                                                                                                                                                                                       |         |
| 6.                       | ID (auto assign)                   | Alpha numeric    |                                                                                                                                                                                                       |         |
| 7.                       | Age (completed years)              | Discrete         |                                                                                                                                                                                                       |         |
| 8.                       | Gender                             | Nominal          | 1. Male<br>2. Female<br>3. Transgender                                                                                                                                                                |         |
| 9.                       | Education                          | Ordinal          | 1. Graduate & above<br>2. Secondary school<br>3. Primary school<br>4. No education                                                                                                                    |         |

## Supplementary file 1: Surveillance for mask compliance, Tamil Nadu, India

|                                            |                                                                                                                                                                  |         |                                                                                                                                                                                                               |                                       |
|--------------------------------------------|------------------------------------------------------------------------------------------------------------------------------------------------------------------|---------|---------------------------------------------------------------------------------------------------------------------------------------------------------------------------------------------------------------|---------------------------------------|
| 10.                                        | Occupation                                                                                                                                                       | Nominal | 1. Govt employee<br>2. Non-govt employee<br>3. Daily wages<br>4. Self-employed<br>5. Non-paid<br>6. Student<br>7. Home maker<br>8. Retired<br>9. Unemployed (able to work)<br>10. Unemployed (unable to work) |                                       |
| <b>COVID-19 status</b>                     |                                                                                                                                                                  |         |                                                                                                                                                                                                               |                                       |
| 11.                                        | Have you been tested for COVID-19 so far?                                                                                                                        | Nominal | 1. Yes<br>2. No                                                                                                                                                                                               | If the answer is “No”, go to Q.no. 13 |
| 12.                                        | Were you declared positive for COVID-19?                                                                                                                         | Nominal | 1. Yes<br>2. No                                                                                                                                                                                               |                                       |
| 13.                                        | Did any of the household members test positive for COVID-19?                                                                                                     | Nominal | 1. Yes<br>2. No                                                                                                                                                                                               |                                       |
| 14.                                        | Did any of your relatives/friends test positive for COVID-19?                                                                                                    | Nominal | 1. Yes<br>2. No                                                                                                                                                                                               |                                       |
| 15.                                        | Did anyone known to you (household members/friends/relatives) die of COVID-19?                                                                                   | Nominal | 1. Yes<br>2. No                                                                                                                                                                                               |                                       |
| <b>Awareness and Knowledge of COVID-19</b> |                                                                                                                                                                  |         |                                                                                                                                                                                                               |                                       |
| 16.                                        | How would you rate your knowledge level on how to prevent spread of the Coronavirus, between 0 to 5, 0 being “No knowledge” and 5 being the Excellent knowledge  | Ordinal | Likert 0 to 5                                                                                                                                                                                                 |                                       |
| 17.                                        | Please indicate what do you think as your level of risk for contracting coronavirus or COVID-19, between 0 to 5, 0 being “No risk” and 5 being the highest risk. | Ordinal | Likert 0 to 5                                                                                                                                                                                                 |                                       |

## Supplementary file 1: Surveillance for mask compliance, Tamil Nadu, India

|     |                                                                                      |                   |                                         |  |
|-----|--------------------------------------------------------------------------------------|-------------------|-----------------------------------------|--|
| 18. | How are you practising the following steps to protect yourself from the Coronavirus? | Group of question |                                         |  |
| 19. | 1. Physical distancing                                                               | Nominal           | 1. Always<br>2. Sometimes<br>3. Never   |  |
| 20. | 2. Staying confined within the home                                                  | Nominal           | 1. Always<br>2. Sometimes<br>3. Never   |  |
| 21. | 3. Non-essential travel                                                              | Nominal           | 1. Frequent<br>2. Sometimes<br>3. Never |  |
| 22. | 4. Visiting family, friends in their homes                                           | Nominal           | 1. Frequent<br>2. Sometimes<br>3. Never |  |
| 23. | 5. Postponing/cancelling medical appointments, procedures or surgeries               | Nominal           | 1. Always<br>2. Sometimes<br>3. Never   |  |
| 24. | 6. Inviting guests to home                                                           | Nominal           | 1. Frequent<br>2. Sometimes<br>3. Never |  |
| 25. | 7. Allowing maid or people who come for household work into house                    | Nominal           | 1. Always<br>2. Sometimes<br>3. Never   |  |
| 26. | 8. Wearing a mask or face covering while moving outdoors?                            | Nominal           | 1. Always<br>2. Sometimes<br>3. Never   |  |
| 27. | 9. Wearing a mask or face covering while moving speaking with neighbours or guests?  | Nominal           | 1. Always<br>2. Sometimes<br>3. Never   |  |
| 28. | 10. Carrying a hand sanitizer while going out of home to sanitize your hands         | Nominal           | 1. Always<br>2. Sometimes<br>3. Never   |  |

## Supplementary file 1: Surveillance for mask compliance, Tamil Nadu, India

|                          |                                                                                                                                                |                    |                                                                                                                                                         |                                                   |
|--------------------------|------------------------------------------------------------------------------------------------------------------------------------------------|--------------------|---------------------------------------------------------------------------------------------------------------------------------------------------------|---------------------------------------------------|
| 29.                      | 11. Washing your hands immediately after entering home                                                                                         | Nominal            | <ol style="list-style-type: none"> <li>1. Always</li> <li>2. Sometimes</li> <li>3. Never</li> <li>4. Not applicable (If never goes out home)</li> </ol> |                                                   |
| <b>Knowledge Masks</b>   |                                                                                                                                                |                    |                                                                                                                                                         |                                                   |
| 30.                      | Does wearing a mask help to reduce the spread of the coronavirus?                                                                              | Nominal            | <ol style="list-style-type: none"> <li>1. Yes, a lot</li> <li>2. Yes, some</li> <li>3. No, it does nothing</li> <li>4. Don't know/refused</li> </ol>    |                                                   |
| 31.                      | As far as you are aware, what is our current Government policy on wearing face coverings in each of the following places? Masks should be worn | Group of questions |                                                                                                                                                         |                                                   |
| 32.                      | 1. While going out of the home                                                                                                                 | Nominal            | <ol style="list-style-type: none"> <li>1. Compulsory</li> <li>2. Optional</li> <li>3. Don't know</li> </ol>                                             |                                                   |
| 33.                      | 2. While travelling in Public transport such as a bus etc                                                                                      | Nominal            | <ol style="list-style-type: none"> <li>1. Compulsory</li> <li>2. Optional</li> <li>3. Don't know</li> </ol>                                             |                                                   |
| 34.                      | 3. In all indoor public spaces such as gyms, functions, marriage halls, etc.                                                                   | Nominal            | <ol style="list-style-type: none"> <li>1. Compulsory</li> <li>2. Optional</li> <li>3. Don't know</li> </ol>                                             |                                                   |
| 35.                      | 4. In all outdoor public spaces, such as shops, bus stops, etc                                                                                 | Nominal            | <ol style="list-style-type: none"> <li>1. Compulsory</li> <li>2. Optional</li> <li>3. Don't know</li> </ol>                                             |                                                   |
| <b>Proper mask usage</b> |                                                                                                                                                |                    |                                                                                                                                                         |                                                   |
| 36.                      | How often you wear mask when you go out?                                                                                                       | Nominal            | <ol style="list-style-type: none"> <li>1. Always</li> <li>2. Most of the times</li> <li>3. Sometimes</li> <li>4. Rarely</li> <li>5. Never</li> </ol>    | <b>Skip to Q. No. 45 if the answer is "Never"</b> |
| 37.                      | What type of mask you wear most of the times?                                                                                                  | Nominal            | <ol style="list-style-type: none"> <li>1. Cloth mask</li> </ol>                                                                                         |                                                   |

## Supplementary file 1: Surveillance for mask compliance, Tamil Nadu, India

|     |                                                                   |         |                                                                                                                                                                                                                            |  |
|-----|-------------------------------------------------------------------|---------|----------------------------------------------------------------------------------------------------------------------------------------------------------------------------------------------------------------------------|--|
|     |                                                                   |         | <ul style="list-style-type: none"> <li>2. Medical masks</li> <li>3. N-95 masks/respirators</li> <li>4. Pollution mask</li> <li>5. Kerchief/ cloth fabric</li> </ul>                                                        |  |
| 38. | How do wear your mask most of the time?                           | Nominal | <ul style="list-style-type: none"> <li>1. Covering chin</li> <li>2. Covering chin and mouth</li> <li>3. Covering chin, mouth and nose</li> <li>4. Below chin</li> </ul>                                                    |  |
| 39. | Do you wash hands before wearing the mask?                        | Nominal | <ul style="list-style-type: none"> <li>1. Always</li> <li>2. Most of the times</li> <li>3. Sometimes</li> <li>4. Rarely</li> <li>5. Never</li> </ul>                                                                       |  |
| 40. | How often you touch the front side of your mask after wearing it? | Nominal | <ul style="list-style-type: none"> <li>1. Always</li> <li>2. Most of the times</li> <li>3. Sometimes</li> <li>4. Rarely</li> <li>5. Never</li> </ul>                                                                       |  |
| 41. | Do you wash your hands after removing the mask?                   | Nominal | <ul style="list-style-type: none"> <li>1. Always</li> <li>2. Most of the times</li> <li>3. Sometimes</li> <li>4. Rarely</li> <li>5. Never</li> </ul>                                                                       |  |
| 42. | How frequently you change/wash your mask?                         | Nominal | <ul style="list-style-type: none"> <li>1. Daily/wash daily (applicable only for cloth mask)</li> <li>2. Once in two-three days</li> <li>3. Once in a week</li> <li>4. More than a week</li> <li>5. Never change</li> </ul> |  |
| 43. | How do you dispose the mask?                                      | Nominal | <ul style="list-style-type: none"> <li>1. Into a public bin</li> <li>2. Collect in a bin/cover and dispose into public bin</li> </ul>                                                                                      |  |

## Supplementary file 1: Surveillance for mask compliance, Tamil Nadu, India

|                               |                                                                                                                                                                      |         |                                                                                                                                                  |  |
|-------------------------------|----------------------------------------------------------------------------------------------------------------------------------------------------------------------|---------|--------------------------------------------------------------------------------------------------------------------------------------------------|--|
|                               |                                                                                                                                                                      |         | 3. Throw it in road<br>4. Never dispose<br>5. Other _____                                                                                        |  |
| 44.                           | How often you carry hand sanitizer with you?                                                                                                                         | Nominal | 1. Always<br>2. Most of the times<br>3. Sometimes<br>4. Rarely<br>5. Never                                                                       |  |
| <b>Attitude towards masks</b> |                                                                                                                                                                      |         |                                                                                                                                                  |  |
| 45.                           | <b>How strongly do you agree or disagree with the following?</b>                                                                                                     |         |                                                                                                                                                  |  |
| 46.                           | I shouldn't be forced to wear a mask                                                                                                                                 | Nominal | 1. Strongly agree<br>2. Somewhat agree<br>3. Neither agree nor disagree<br>4. Somewhat disagree<br>5. Strongly disagree<br>6. Don't know/refused |  |
| 47.                           | Everyone, including people who do not have symptoms, should wear a cloth face covering if they leave their home to prevent possible transmission of the Coronavirus. | Nominal | 1. Strongly agree<br>2. Somewhat agree<br>3. Neither agree nor disagree<br>4. Somewhat disagree<br>5. Strongly disagree<br>6. Don't know/refused |  |
| 48.                           | I worry that if I wear a cloth face covering out in public, other people will think I am infected with the Coronavirus.                                              | Nominal | 1. Strongly agree<br>2. Somewhat agree<br>3. Neither agree nor disagree<br>4. Somewhat disagree<br>5. Strongly disagree<br>6. Don't know/refused |  |
| 49.                           | Face masks disrupt my breathing.                                                                                                                                     | Nominal | 1. Strongly agree<br>2. Somewhat agree<br>3. Neither agree nor disagree<br>4. Somewhat disagree                                                  |  |

## Supplementary file 1: Surveillance for mask compliance, Tamil Nadu, India

|                                     |                                                                   |         |                                                                                                                                                  |  |
|-------------------------------------|-------------------------------------------------------------------|---------|--------------------------------------------------------------------------------------------------------------------------------------------------|--|
|                                     |                                                                   |         | 5. Strongly disagree<br>6. Don't know/refused                                                                                                    |  |
| 50.                                 | Face masks cause me to overheat                                   | Nominal | 1. Strongly agree<br>2. Somewhat agree<br>3. Neither agree nor disagree<br>4. Somewhat disagree<br>5. Strongly disagree<br>6. Don't know/refused |  |
| 51.                                 | Face mask disturbs my conversation with others                    | Nominal | 1. Strongly agree<br>2. Somewhat agree<br>3. Neither agree nor disagree<br>4. Somewhat disagree<br>5. Strongly disagree<br>6. Don't know/refused |  |
| 52.                                 | Face masks are unsafe because they force you to touch your face   | Nominal | 1. Strongly agree<br>2. Somewhat agree<br>3. Neither agree nor disagree<br>4. Somewhat disagree<br>5. Strongly disagree<br>6. Don't know/refused |  |
| 53.                                 | Face masks are too expensive.                                     | Nominal | 1. Strongly agree<br>2. Somewhat agree<br>3. Neither agree nor disagree<br>4. Somewhat disagree<br>5. Strongly disagree<br>6. Don't know/refused |  |
| <b>Physical distancing practice</b> |                                                                   |         |                                                                                                                                                  |  |
| 54.                                 | Is physical distancing being followed strictly in your workplace? | Nominal | 1. Always<br>2. Most of the times<br>3. Sometimes<br>4. Rarely<br>5. Never                                                                       |  |

## Supplementary file 1: Surveillance for mask compliance, Tamil Nadu, India

|                                                                          |                                                                                                         |         |                                                                                                                                                                                                                                  |                                            |
|--------------------------------------------------------------------------|---------------------------------------------------------------------------------------------------------|---------|----------------------------------------------------------------------------------------------------------------------------------------------------------------------------------------------------------------------------------|--------------------------------------------|
| 55.                                                                      | Is physical distancing being implemented in the places you visit like market, malls, departmental store | Nominal | <ol style="list-style-type: none"> <li>1. Always</li> <li>2. Most of the times</li> <li>3. Sometimes</li> <li>4. Rarely</li> <li>5. Never</li> </ol>                                                                             |                                            |
| 56.                                                                      | Do you think maintaining physical distancing is difficult in our setting?                               | Nominal | <ol style="list-style-type: none"> <li>1. Strongly agree</li> <li>2. Somewhat agree</li> <li>3. Neither agree nor disagree</li> <li>4. Somewhat disagree</li> <li>5. Strongly disagree</li> <li>6. Don't know/refused</li> </ol> |                                            |
| Practices in workplace (Skip if the answer to Q.no.10 is "7-Home maker") |                                                                                                         |         |                                                                                                                                                                                                                                  |                                            |
| 57.                                                                      | How often you go to your workplace?                                                                     | Nominal | <ol style="list-style-type: none"> <li>1. Daily</li> <li>2. Once in two-three days</li> <li>3. Once in a week</li> <li>4. More than a week</li> <li>5. Never go to workplace (working from home)</li> </ol>                      | End the interview if the answer is "Never" |
| 58.                                                                      | Do you wear face mask in your workplace?                                                                | Nominal | <ol style="list-style-type: none"> <li>1. Always</li> <li>2. Most of the times</li> <li>3. Sometimes</li> <li>4. Rarely</li> <li>5. Never</li> </ol>                                                                             |                                            |
| 59.                                                                      | Do you share your food while eating at workplace?                                                       | Nominal | <ol style="list-style-type: none"> <li>1. Always</li> <li>2. Most of the times</li> <li>3. Sometimes</li> <li>4. Rarely</li> <li>5. Never</li> </ol>                                                                             |                                            |
| 60.                                                                      | Is your temperature checked daily at your workplace?                                                    | Nominal | <ol style="list-style-type: none"> <li>1. Always</li> <li>2. Most of the times</li> <li>3. Sometimes</li> <li>4. Rarely</li> <li>5. Never</li> </ol>                                                                             |                                            |



## Supplementary file 1: Surveillance for mask compliance, Tamil Nadu, India

|     |                                                                                                                                         |         |                                                                            |                                                  |
|-----|-----------------------------------------------------------------------------------------------------------------------------------------|---------|----------------------------------------------------------------------------|--------------------------------------------------|
| 61. | Is hand sanitizer available at your workplace?                                                                                          | Nominal | 1. Always<br>2. Most of the times<br>3. Sometimes<br>4. Rarely<br>5. Never |                                                  |
| 62. | Does your workplace encourage self-reporting of symptoms?                                                                               | Nominal | 1. Yes<br>2. No<br>3. Not sure                                             |                                                  |
| 63. | Does your workplace offer paid leave if anyone is affected with COVID-19 or if any of the household members are affected with COVID-19? | Nominal | 1. Yes<br>2. No<br>3. Not sure                                             | End the interview if the answer is "No/Not sure" |
| 64. | If yes, how many days of paid leave are given?                                                                                          | Numeric |                                                                            |                                                  |
